# Supplementary material for: CD10-Bound Human Mesenchymal Stem/Stromal Cell-Derived Exosomes Possess Immunomodulatory Cargo and Maintain Cartilage Homeostasis under Inflammatory Conditions
Source: Preprints.org preprint supplement (doi:10.20944/preprints202305.1465.v1), 2023-05-22

**Supplementary Table S2.** The colors for different evidence codes and for log scale in the g:Profiler functional enrichment analysis

The colors for different evidence codes in the table:

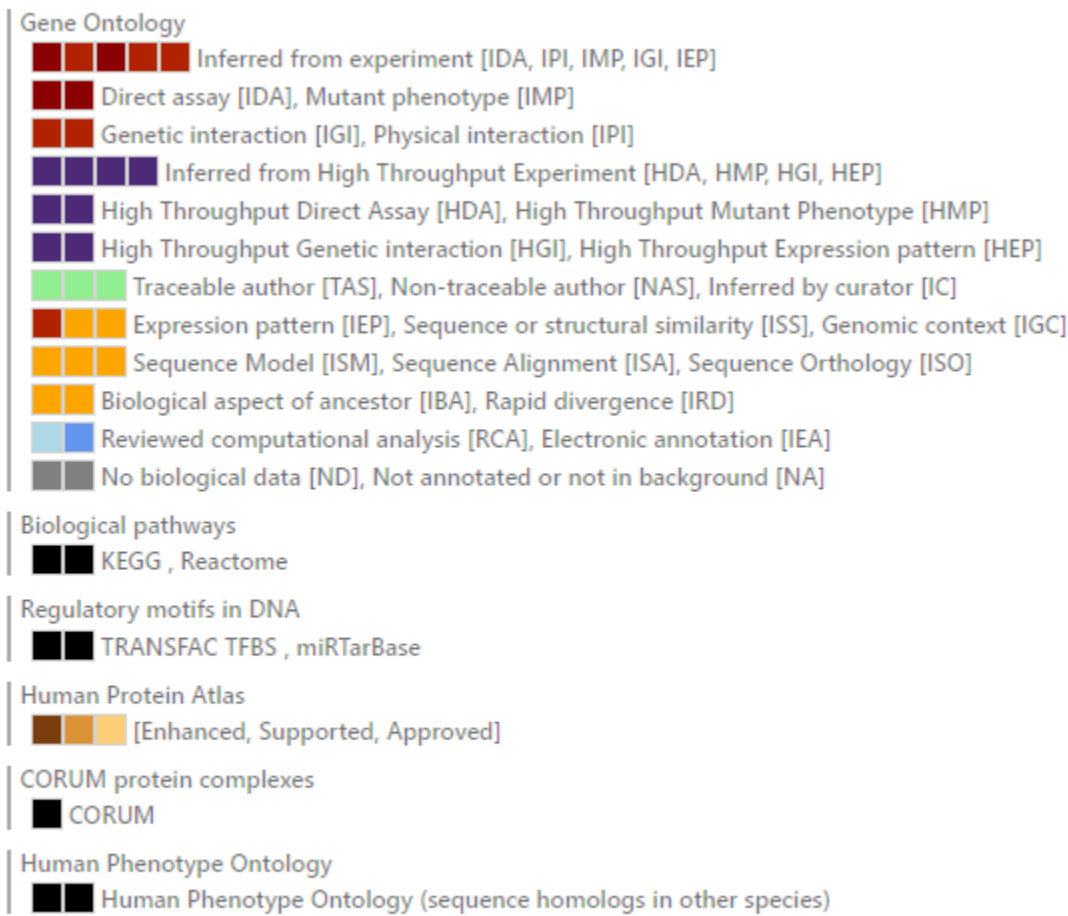

Supplement: Supplementary file 1 [file supplementary]
